# Supplementary material for: A Horizontal-Gate Monolayer MoS2 Transistor Based on Image Force Barrier Reduction
Source: PubMed Central journal article supplement (PMC6780131; doi:10.3390/nano9091245), 2019-09-02
Supplement: nanomaterials-09-01245-s001.pdf [file nanomaterials-09-01245-s001.pdf]

# Supplementary material

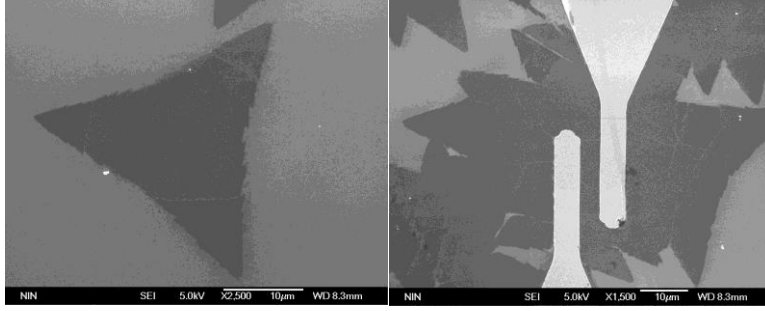

**Figure S1.** The SEM images of monolayer MoS<sub>2</sub> and transistor.

**Table S1.** Comparison of the performance of device with literature.

| Ref.       | Materials                           | Ion/Ioff Ratio       | On-state Current(A) | Dielectric                                       | Structure       | Process complexity |
|------------|-------------------------------------|----------------------|---------------------|--------------------------------------------------|-----------------|--------------------|
| Our result | MoS <sub>2</sub>                    | $\sim 1 \times 10^4$ | $2 \times 10^{-7}$  | 300nm SiO <sub>2</sub>                           | Horizontal-gate | I                  |
| [1]        | MoS <sub>2</sub>                    | $\sim 1 \times 10^4$ | $3 \times 10^{-6}$  | 90nm SiO <sub>2</sub>                            | Back-gate       | II                 |
| [2]        | MoS <sub>2</sub>                    | $\sim 1 \times 10^4$ | $3 \times 10^{-7}$  | SiO <sub>2</sub>                                 | Back-gate       | II                 |
| [3]        | MoS <sub>2</sub>                    | $\sim 10^6$          | $1 \times 10^{-6}$  | Al <sub>2</sub> O <sub>3</sub> /HfO <sub>2</sub> | Dual-gate       | IV                 |
| [4]        | MoS <sub>2</sub> /BP                | $\sim 10^4$          | $1 \times 10^{-7}$  | Ion gel(top)                                     | Top-gate        | III                |
| [5]        | WSe <sub>2</sub> /SnSe <sub>2</sub> | $\sim 10^5$          | $9 \times 10^{-7}$  | 40nm Al <sub>2</sub> O <sub>3</sub><br>(bottom)  | Back-gate       | II                 |

Process complexity progressively increases from I to IV.

**Table S2.** Typical values of parameters in equations.

| parameters                                 |                                | Value                      |
|--------------------------------------------|--------------------------------|----------------------------|
| L(µm)                                      | Length of channel              | 8                          |
| W(µm)                                      | Width of channel               | 40                         |
| t <sub>ox</sub> (nm)                       | Thickness of oxide             | 300                        |
| g <sub>m</sub> (S)                         | Trans-conductance              | $di_{ds}/dv_{gs}$          |
| C <sub>ox</sub> (F/µm <sup>2</sup> )       | Gate capacitance per unit area | $1.15 \times 10^{-4}$      |
| µ <sub>0</sub> (cm <sup>2</sup> /V · s)    | Mobility                       | 2.06                       |
| V <sub>th</sub> (V)                        | Threshold voltage              | -16                        |
| R <sub>total</sub> (Ω)                     | Total resistance               | $v_{ds}/i_{ds}$            |
| A* (A/(cm <sup>2</sup> · K <sup>2</sup> )) | Richardson's coefficient       | 120                        |
| k(J/K)                                     | Boltzmann constant             | $1.380649 \times 10^{-23}$ |
| T(K)                                       | Temperature                    | 300                        |

## References

1. Y. Vaknin, R. Dagan, and Y. Rosenwaks, *Nanomaterials (Basel)* **9** (6) (2019).
2. Y. H. Lee, X. Q. Zhang, W. Zhang, M. T. Chang, C. T. Lin, K. D. Chang, Y. C. Yu, J. T. Wang, C. S. Chang, L. J. Li, and T. W. Lin, *Adv Mater* **24** (17), 2320 (2012).
3. Pavel Bolshakov, Ava Khosravi, Peng Zhao, Paul K. Hurley, Christopher L. Hinkle, Robert M. Wallace, and Chadwin D. Young, *Applied Physics Letters* **112** (25) (2018).
4. Jiao Xu, Jingyuan Jia, Shen Lai, Jaehyuk Ju, and Sungjoo Lee, *Applied Physics Letters* **110** (3) (2017).
5. X. Yan, C. Liu, C. Li, W. Bao, S. Ding, D. W. Zhang, and P. Zhou, *Small* **13** (34) (2017).
